# Supplementary material
Source: PubMed Central journal article supplement (PMC10810152)
Supplement: media-1.pdf [file media-1.pdf]

1  
2  
3  
4  
5  
6  
7  
8  
9  
10  
11  
12  
13  
14  
15  
16  
17

Supplementary Material:  
Neural manifolds carry reactivation of phonetic  
representations during semantic processing

Pavo Orepic<sup>1</sup>, Wilson Truccolo<sup>2,3</sup>, Eric Halgren<sup>4</sup>,  
Sydney S. Cash<sup>5</sup>, Anne-Lise Giraud<sup>1,6</sup>, Timothée Proix<sup>1\*</sup>

<sup>1</sup>Department of Basic Neurosciences, Faculty of Medicine, University of  
Geneva, Geneva, Switzerland.

<sup>2</sup>Department of Neuroscience, Brown University, Providence, Rhode  
Island, United States of America.

<sup>3</sup>Carney Institute for Brain Science, Brown University, Providence,  
Rhode Island, United States of America.

<sup>4</sup>Department of Neuroscience & Radiology, University of California San  
Diego, La Jolla, California, United States of America.

<sup>5</sup>Department of Neurology, Massachusetts General Hospital, Harvard  
Medical School, Boston, Massachusetts, United States of America.

<sup>6</sup>Institut Pasteur, Université Paris Cité, Hearing Institute, Paris, France.

\*Corresponding author(s). E-mail(s): [timothee.proix@unige.ch](mailto:timothee.proix@unige.ch);

# 1 Phonetic and semantic mTRF features

**Supplementary Table 1 | Vowels used in the mTRF models.** Duration is computed as the mean in milliseconds across all occurrences of the same phoneme.

| Vowel | Repetitions | Duration | First formant |      | Second formant |        |      |
|-------|-------------|----------|---------------|------|----------------|--------|------|
|       |             |          | Low           | High | Front          | Middle | Back |
| /æ/   | 64          | 87.8     | 1             | 0    | 1              | 0      | 0    |
| /ʌ/   | 103         | 47.0     | 1             | 0    | 0              | 0      | 1    |
| /ɪ/   | 61          | 56.1     | 0             | 1    | 1              | 0      | 0    |
| /ɜ/   | 43          | 89.4     | 1             | 0    | 0              | 1      | 0    |
| /u:/  | 31          | 81.8     | 0             | 1    | 0              | 0      | 1    |
| /ɒ/   | 49          | 73.4     | 1             | 0    | 0              | 0      | 1    |
| /ɛ/   | 44          | 66.4     | 1             | 0    | 1              | 0      | 0    |
| /ɔ/   | 29          | 91.5     | 1             | 0    | 0              | 0      | 1    |
| /i/   | 55          | 89.6     | 0             | 1    | 1              | 0      | 0    |
| /u/   | 7           | 57.1     | 0             | 1    | 0              | 0      | 1    |
| /ʊ/   | 8           | 33.8     | 0             | 1    | 0              | 0      | 1    |

**Supplementary Table 2 | Consonants used in the mTRF models.** Duration is computed as the mean in milliseconds across all occurrences of the same phoneme.

| Consonant | Repetitions | Duration | Articulation place |             |          |       |        |         | Articulation manner |       |           |             |                     |   |
|-----------|-------------|----------|--------------------|-------------|----------|-------|--------|---------|---------------------|-------|-----------|-------------|---------------------|---|
|           |             |          | Bilabial           | Labiodental | Alveolar | Velar | Uvular | Glottal | Plosive             | Nasal | Fricative | Approximant | Lateral approximant |   |
| /ŋ/       | 19          | 52.8     | 0                  | 0           | 0        | 1     | 0      | 0       | 0                   | 1     | 0         | 0           | 0                   | 0 |
| /k/       | 135         | 41.0     | 0                  | 0           | 0        | 1     | 0      | 0       | 1                   | 0     | 0         | 0           | 0                   | 0 |
| /l/       | 123         | 47.9     | 0                  | 0           | 1        | 0     | 0      | 0       | 0                   | 0     | 0         | 0           | 0                   | 1 |
| /t/       | 120         | 53.0     | 0                  | 0           | 1        | 0     | 0      | 0       | 1                   | 0     | 0         | 0           | 0                   | 0 |
| /n/       | 89          | 46.2     | 0                  | 0           | 1        | 0     | 0      | 0       | 0                   | 1     | 0         | 0           | 0                   | 0 |
| /p/       | 75          | 36.7     | 1                  | 0           | 0        | 0     | 0      | 0       | 1                   | 0     | 0         | 0           | 0                   | 0 |
| /f/       | 45          | 36.7     | 0                  | 1           | 0        | 0     | 0      | 0       | 0                   | 0     | 1         | 0           | 0                   | 0 |
| /d/       | 51          | 34.0     | 0                  | 0           | 1        | 0     | 0      | 0       | 1                   | 0     | 0         | 0           | 0                   | 0 |
| /ʒ/       | 100         | 38.3     | 0                  | 0           | 0        | 0     | 1      | 0       | 0                   | 0     | 1         | 0           | 0                   | 0 |
| /ʃ/       | 22          | 70.7     | 0                  | 0           | 1        | 0     | 0      | 0       | 0                   | 0     | 1         | 0           | 0                   | 0 |
| /s/       | 104         | 65.0     | 0                  | 0           | 1        | 0     | 0      | 0       | 0                   | 0     | 1         | 0           | 0                   | 0 |
| /b/       | 79          | 22.0     | 1                  | 0           | 0        | 0     | 0      | 0       | 1                   | 0     | 0         | 0           | 0                   | 0 |
| /dʒ/      | 18          | 59.0     | 0                  | 0           | 1        | 0     | 0      | 0       | 0                   | 0     | 1         | 0           | 0                   | 0 |
| /m/       | 60          | 46.6     | 1                  | 0           | 0        | 0     | 0      | 0       | 0                   | 1     | 0         | 0           | 0                   | 0 |
| /g/       | 36          | 35.0     | 0                  | 0           | 0        | 1     | 0      | 0       | 1                   | 0     | 0         | 0           | 0                   | 0 |
| /v/       | 13          | 28.5     | 0                  | 1           | 0        | 0     | 0      | 0       | 0                   | 0     | 1         | 0           | 0                   | 0 |
| /h/       | 25          | 37.9     | 0                  | 0           | 0        | 0     | 0      | 1       | 0                   | 0     | 1         | 0           | 0                   | 0 |
| /z/       | 13          | 50.0     | 0                  | 0           | 1        | 0     | 0      | 0       | 0                   | 0     | 1         | 0           | 0                   | 0 |
| /tʃ/      | 31          | 67.8     | 0                  | 0           | 1        | 0     | 0      | 0       | 0                   | 0     | 1         | 0           | 0                   | 0 |
| /w/       | 22          | 35.8     | 0                  | 0           | 0        | 1     | 0      | 0       | 0                   | 0     | 0         | 1           | 0                   | 0 |
| /θ/       | 10          | 29.0     | 0                  | 0           | 1        | 0     | 0      | 0       | 0                   | 0     | 1         | 0           | 0                   | 0 |

**Supplementary Table 3 | Semantic features for the semantic task.**

|                            | <b>Semantic features</b> | <b>Repetitions</b> |
|----------------------------|--------------------------|--------------------|
| <i>Conceptual category</i> | Object                   | 200                |
|                            | Animal                   | 200                |
| <i>Perceptual category</i> | Bigger than a foot       | 200                |
|                            | Smaller than a foot      | 200                |
| <i>Semantic decision</i>   | Bigger than a foot       | 139                |
|                            | Smaller than a foot      | 261                |

**Supplementary Table 4 | Word class features for natural speech perception.**

| <b>Word class</b> | <b>Repetitions</b> | <b>Unique repetitions</b> |
|-------------------|--------------------|---------------------------|
| Noun              | 147                | 97                        |
| Verb              | 105                | 49                        |
| Adjective         | 26                 | 17                        |
| Adverb            | 31                 | 13                        |
| Article           | 49                 | 5                         |
| Auxiliary         | 15                 | 8                         |
| Demonstrative     | 17                 | 4                         |
| Quantifier        | 7                  | 3                         |
| Preposition       | 88                 | 25                        |
| Pronoun           | 78                 | 18                        |
| Conjunction       | 32                 | 7                         |
| Interjection      | 41                 | 12                        |
| Number            | 28                 | 14                        |

**Supplementary Table 5 | Lexical semantics feature for natural speech perception.**

| <b>Lancaster sensorimotor norm</b> | <b>Strength</b> |
|------------------------------------|-----------------|
| Auditory                           | 1.83            |
| Gustatory                          | 0.36            |
| Haptic                             | 1.13            |
| Interoceptive                      | 1.2             |
| Olfactory                          | 0.44            |
| Visual                             | 2.73            |
| Foot, leg                          | 1.03            |
| Hand, arm                          | 1.49            |
| Head                               | 2.37            |
| Mouth                              | 1.4             |
| Torso                              | 0.91            |

## 1 Additional mTRF models

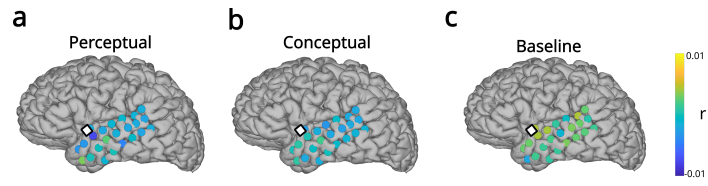

**Supplementary Fig. 1 | Non-significant and baseline ECoG models** **a.** Encoding of perceptual category across ECoG channels. Colors indicate differences in  $r$  values compared to the baseline model. No channel was significantly higher ( $p < 0.05$ ) than the chance level  $r$  values of a surrogate distribution. **b.** Encoding of conceptual category across ECoG channels. Colors and significance as in a. **c.** Encoding of the baseline model (word onset and acoustic edges) across ECoG channels.

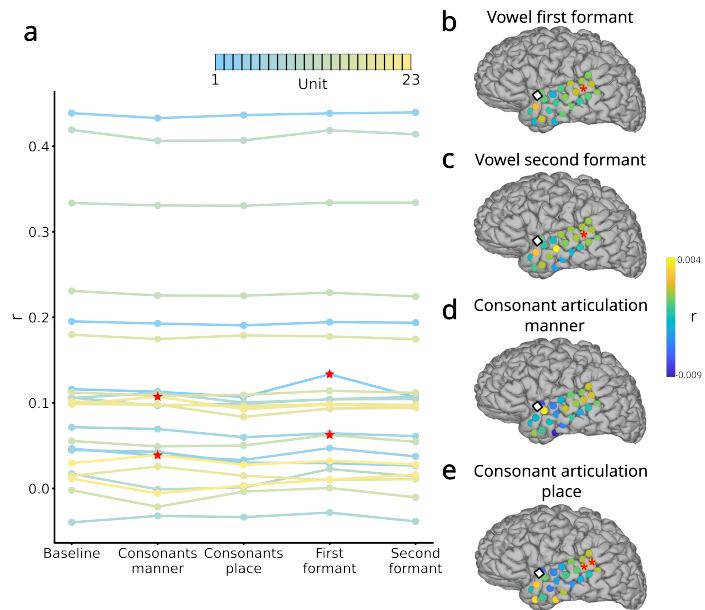

**Supplementary Fig. 2 | Phonetic encoding at the single-unit and LFP level in the aSTG.** **a.** Pearson correlation coefficient ( $r$  values) for models including each phonetic feature group fitted to each of the 23 single units with the highest firing rates in the ensemble. The lines for different units are color-coded based on firing rate, from lower (blue) to higher (yellow). Red stars indicate units for which  $r$  values of the fitted models are significantly higher ( $p < 0.05$ ) than the chance level  $r$  values of a surrogate distribution. **b-e** Encoding of vowel first formant, vowel second formant, consonant manner of articulation, and consonant place of articulation across ECoG channels. Colors indicate differences in  $r$  values compared to the baseline model. Red stars indicate significance as above.

## 1 Clustering control analyses for the semantic task

2 To confirm our clustering results, we conducted several control analyses. We first con-  
3 firmed that our results did not change when using PC spaces with more than two  
4 PC dimensions. Thus, we computed the clustering index for all four phonetic features  
5 (vowel first formant, vowel second formant, consonant manner of articulation, conso-  
6 nant place of articulation) up to the sixth PC dimension (Supplementary Fig. 3). The  
7 results observed for two dimensions largely generalized when using more dimensions  
8 for the PC space.

9 For the vowel second formant group, we additionally ascertained that the lack of  
10 clustering was not caused by the fact that it contained three phonetic features (front,  
11 middle, and back position of the tongue) instead of two as for the first formant group  
12 (high, low). We replicated the lack of clustering effects by using two instead of three  
13 phonetic features (front and back position of the tongue, Supplementary Fig. 4).

14 To confirm the observed clustering of phonemes along vowel first formant and con-  
15 sonant manner groups (and the lack of clustering along vowel second formant and  
16 consonant place groups), we performed three alternative analyses: (i) linear discrimi-  
17 nant analysis (LDA) classifier (Supplementary Fig. 5); (ii) for vowels, rank regression  
18 analysis (rank regression was performed to test whether vowels not only separate, but  
19 are also ordered by their first formant value in the PC space, Supplementary Fig. 6);  
20 (iii) k-means clustering (Supplementary Fig. 7).

### 21 Linear discriminant analysis (LDA) classifier

22 We ran the LDA classifier for each of the 4 phonetic groups (vowel first formant, vowel  
23 second formant, consonant manner, consonant place). For each time point, we first  
24 ran an LDA classifier which is a Gaussian mixture model to compute the means of  
25 the multivariate normal distributions for each class. Then, we computed the average  
26 Euclidean distance between all class means and compared it against the distribution  
27 of 1000 surrogates. This is similar to the between-cluster distances from our clustering  
28 algorithm, with the difference that here the class mean (cluster centroid) is a parameter  
29 of the estimated multivariate distribution, and not computed directly by averaging  
30 class elements.

31 Replicating the clustering index analyses, at 200 ms we observed a significant  
32 separation of vowels into first formant categories (Supplementary Fig. 5a). Linear sep-  
33 arators estimated at 0 and 200 ms are shown in Supplementary Fig. 5b. No peaks was  
34 observed for the vowel second formant (Supplementary Fig. 5c). LDA also indicated  
35 the two previously observed peaks for consonant manner (200 and 400 ms), however,  
36 here, they did not reach significance (Supplementary Fig. 5d). Finally, LDA revealed  
37 a significant peak for consonant place at 50 ms (Supplementary Fig. 5e) that was not  
38 observed before.

### 39 Rank regression

40 Since formants are actually ordered by their frequency values along the first and  
41 second formant axis, we additionally explored whether the actual ordering of formant  
42 frequency values was encoded in the low-dimensional space. To that aim, we ran a

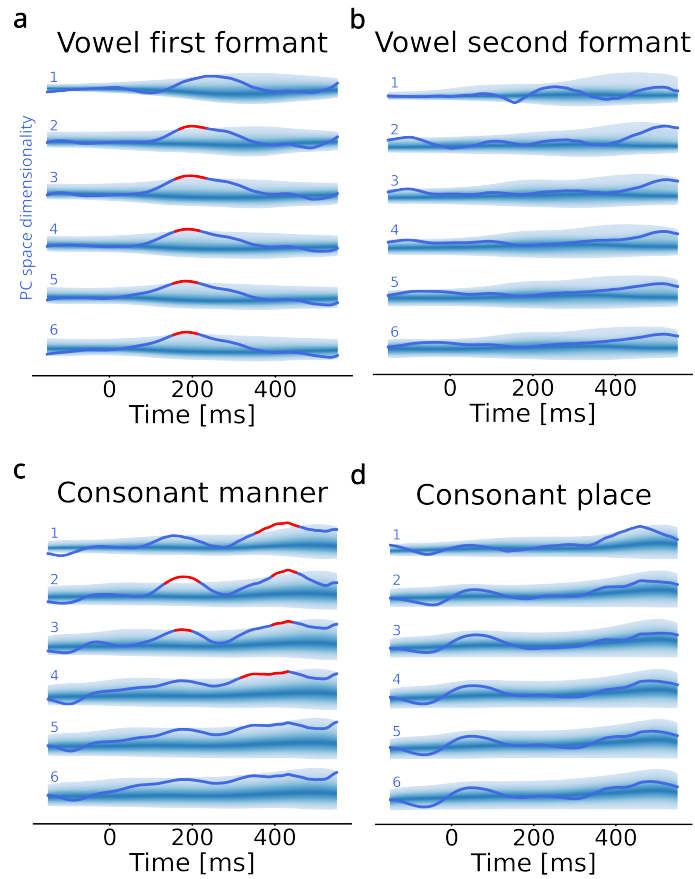

**Supplementary Fig. 3 | Clustering index across dimensions during semantic categorization.** **a.** Clustering index for vowels grouped by first formant (high and low tongue position) up to six PC dimensions. The 95% confidence region of the surrogate (chance-level) distribution is shown with brighter shading for increasingly peripheral percentiles. Red segments indicate significant periods after multiple comparison correction (cluster-based test). Numbers indicate the dimensionality of the PC space. **b.** Clustering index for vowels grouped by second formant up to six PC dimensions. Coloring and numbering as in **a.** **c.** Clustering index for consonants grouped by manner of articulation up to six PC dimensions. Coloring and numbering as in **a.** **d.** Clustering index for consonants grouped by place of articulation up to six PC dimensions. Coloring and numbering as in **a.**

1 rank regression analysis, where a rank value (1-7) was assigned to each vowel, based on  
 2 the standard IPA table. At each time point, the ranked order of vowels was correlated  
 3 with their coordinates on the first three axes (PC1, PC2, and PC3), and compared  
 4 against a distribution of 1000 surrogates.

5 We observed a significant ordering of vowels based on their first formant ranks on all  
 6 three PCs (Fig. 6a). We performed the same regression for the second formant values

### Vowel second formant (2 clusters)

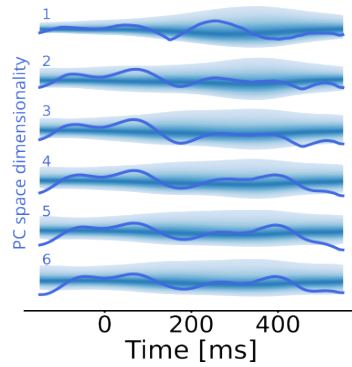

**Supplementary Fig. 4 | Clustering for the vowel second formant group using only two phonetic features.** The 95% confidence region of the surrogate (chance-level) distribution is shown with brighter shading for increasingly peripheral percentiles.

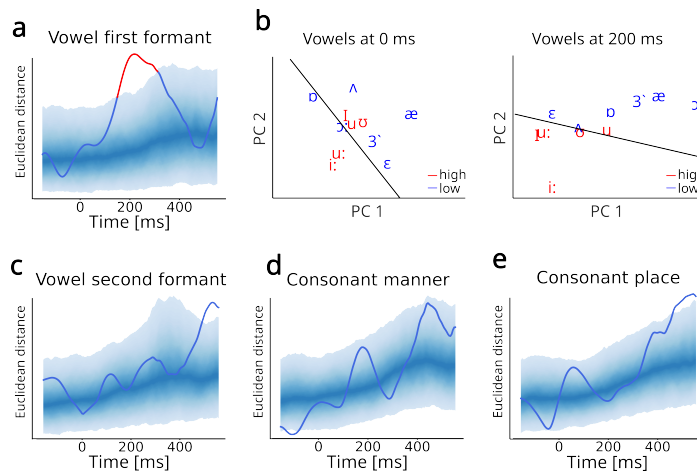

**Supplementary Fig. 5 | Linear discriminant analysis during semantic categorization. a.** Vowel first formant. The 95% confidence region of the surrogate (chance-level) distribution is shown with brighter shading for increasingly peripheral percentiles. Red segments indicate significant periods after multiple comparison correction (cluster-based test). **b.** Estimated linear separators for vowel first formant feature at 0 and 200 ms. **c** Vowel second formant. Shading and red segments are as in **a**. **d.** Consonant manner of articulation. Coloring as in **a**. **e.** Consonant place of articulation. Coloring as in **a**.

- 1 and observed a significant correlation at about 0 ms, but only on PC1 (Supplementary
- 2 Fig. 6b). As the two consonant groups are based on categorical and not continuous
- 3 variables, rank regression analysis is not applicable.

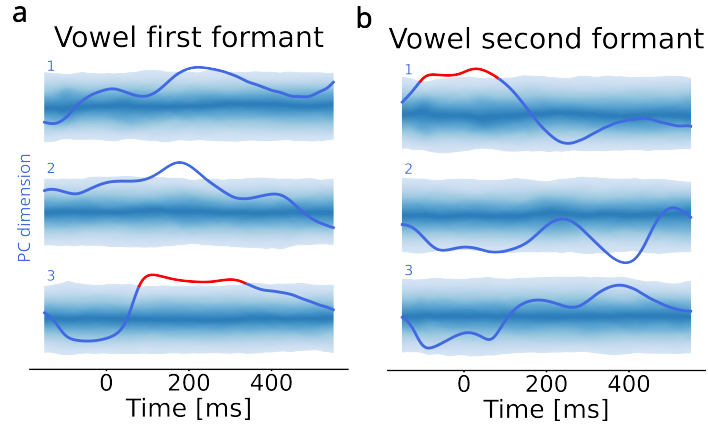

**Supplementary Fig. 6 | Rank regression during semantic categorization.** **a.** Correlation between vowel first formant ranks and coordinates on PC axes. The 95% confidence region of the surrogate (chance-level) distribution is shown with brighter shading for increasingly peripheral percentiles. Red segments indicate significant periods after multiple comparison correction (cluster-based test). Numbers indicate PC dimensions. **b.** Correlation between vowel second formant ranks and coordinates on PC axes. Coloring and numbering as in **a.**

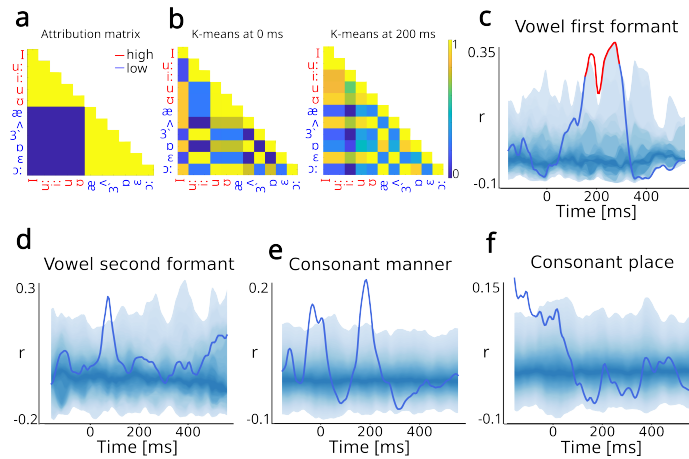

**Supplementary Fig. 7 | K-means clustering during semantic categorization.** **a.** Attribution matrix for the vowel first formant feature. **b.** K-means matrices for the vowel first formant feature at 0 and 200 ms. **c.** Correlation between vowel first formant attribution matrix (**a**) and corresponding k-means matrices (**b**) at each time point. The 95% confidence region of the surrogate (chance-level) distribution is shown with brighter shading for increasingly peripheral percentiles. Red segments indicate significant periods after multiple comparison correction (cluster-based test). **d.** Correlation between vowel second formant and corresponding k-means attribution matrices at each time point. Coloring as in **c.** **e.** Correlation between consonant manner and corresponding k-means matrices at each time point. Coloring as in **c.** **f.** Correlation between consonant place and corresponding k-means matrices at each time point. Coloring as in **c.**

## 1 K-means clustering

- 2 We used k-means clustering to investigate whether the same clustering of phonemes
- 3 would emerge in a data-driven fashion. Our clustering results of the main text neces-
- 4 sitate assigning a priori each of the  $N$  phonemes to a cluster (e.g., for the vowel first



1 formant feature see Supplementary Fig. 7a), and the clustering index is then quantified  
2 based on the Euclidean distances of those a priori chosen clusters. On the contrary,  
3 k-means clustering is an unsupervised method that partitions all N phonemes into  
4 k clusters based on their proximity in PC space. Thus, for each time point, we first  
5 ran k-means clustering 1000 times, as the clustering results might change based on  
6 the algorithm’s random initialization. Then, we computed an average N-by-N attribu-  
7 tion matrix that indicated how often each of the N phonemes was clustered together  
8 (Supplementary Fig. 7b). Finally, we correlated the resulting k-means attribution  
9 matrix with the attribution matrix of the actual, linguistically-based clusters, and  
10 compared the correlation value against the distribution of correlation values for the  
11 1000 surrogates at each time point (Supplementary Fig. 7c-f).

12 Replicating previous clustering results for the vowel first formant group, this anal-  
13 ysis revealed a significant period at about 200 ms during which data-driven clusters  
14 overlapped with the linguistic ones (Supplementary Fig. 7c). This analysis further  
15 revealed a significant peak at 75 ms for vowel second formant that was not present  
16 before (Supplementary Fig. 7d). The 200-ms peak was also observed again for the con-  
17 sonant manner group, with an additional peak at about 0 ms, and no significant peak  
18 at 400 ms (Supplementary Fig. 7e). No significant peaks were observed for consonant  
19 place (Supplementary Fig. 7f).

20 Despite its advantageous data-driven perspective, there are also some important  
21 drawbacks of this method, that can be observed in the shape of the correlation curve  
22 for the vowel first formant group (Supplementary Fig. 7c). Namely, at 200 ms there is a  
23 decrease in the correlation value (although still significant), because at that time point  
24 vowels / $\Lambda$ / and / $\epsilon$ /, which belong to the ‘low’ group, are closer in space to the ‘high’  
25 group (compare the 200-ms insets on Fig. 2e and Supplementary Fig. 7b). However, it  
26 is apparent that, despite their spatial proximity to the ‘high’ group, vowels / $\Lambda$ / and / $\epsilon$ /  
27 can be attributed to the ‘low’ group because the two clusters can be linearly separated  
28 right next to the positions of these two vowels in space (Supplementary Fig. 5b).

## 29 **Summary of control analyses**

30 Supplementary Table 6 summarizes all peaks observed across different analyses for  
31 all 4 groups. Although some analyses sporadically revealed significant peaks for vowel  
32 second formant (k-means) and consonant place (LDA) groups, the peaks that were  
33 consistent across all analyses are the same peaks as observed in our initial cluster-  
34 ing analysis: 200 ms for vowel first formant and consonant manner, and 400 ms for  
35 consonant manner alone.

**Supplementary Table 6 | Summary of the significant window locations during semantic categorization identified through control analyses.** Bold entries indicate peaks that were consistent across analyses. Entries in brackets indicate existing peaks that did not cross the significance threshold. Entries in red indicate peaks surviving multiple comparison correction (cluster-based test). All values are in ms.

| <b>Phonetic feature group</b> | <b>Clustering</b> | <b>LDA</b>        | <b>Rank regression</b> | <b>K-means</b> |
|-------------------------------|-------------------|-------------------|------------------------|----------------|
| Vowel first formant           | <b>200</b>        | <b>200</b>        | <b>200</b>             | <b>200</b>     |
| Vowel second formant          |                   |                   | 0                      | 75             |
| Consonant manner              | <b>200, 400</b>   | <b>(200, 400)</b> | not applicable         | 0, <b>200</b>  |
| Consonant place               |                   | 450               | not applicable         |                |

## 1 **Clustering control analyses for natural speech** 2 **perception**

3 We performed the same control analyses for natural speech perception for each of the  
4 four feature groups (vowel first formant, vowel second formant, consonants manner,  
5 consonant place): clustering up to six dimensions of the PC space (Supplementary  
6 Fig. 8), LDA (Supplementary Fig. 9), rank regression (Supplementary Fig. 10), and  
7 correlation with K-means attribution (Supplementary Fig. 11). We then summarized  
8 the significant peaks observed during natural speech perception across all analyses.  
9 (Supplementary Table 7).

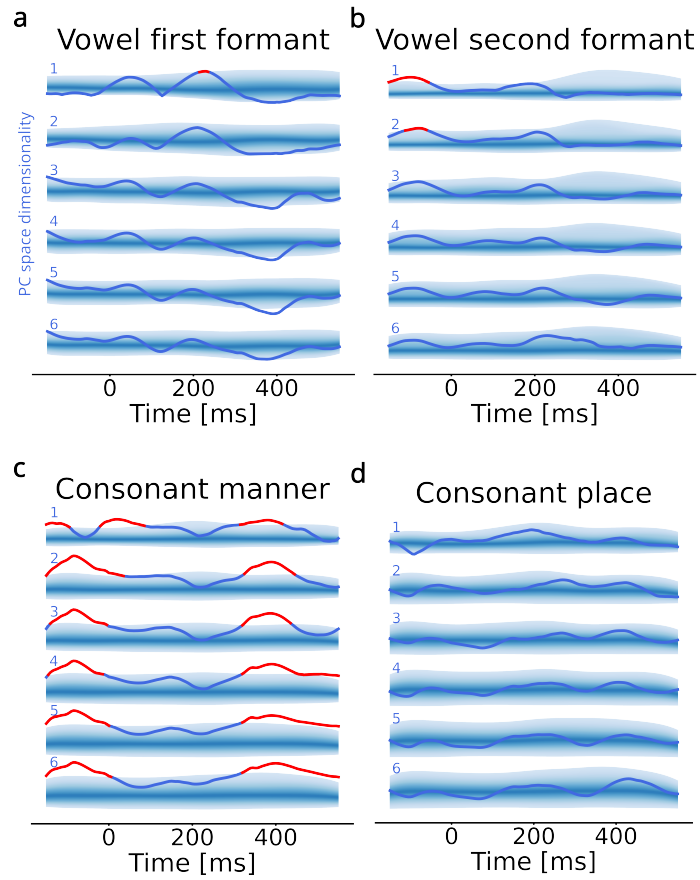

**Supplementary Fig. 8 | Clustering index across dimensions during natural speech perception.** **a.** Clustering index for vowels grouped by the first formant (high and low tongue position) up to 6 PC dimensions. The 95% confidence region of the surrogate (chance-level) distribution is shown with brighter shading for increasingly peripheral percentiles. Numbers indicate the dimensionality of the PC space. **b.** Clustering index for vowels grouped by the second formant up to six PC dimensions. Coloring and numbering as in **a.** **c.** Clustering index for consonants grouped by the manner of articulation up to six PC dimensions. Shading and numbering as in **a.** **d.** Clustering index for consonants grouped by the place of articulation up to six PC dimensions. Coloring and numbering as in **a.**

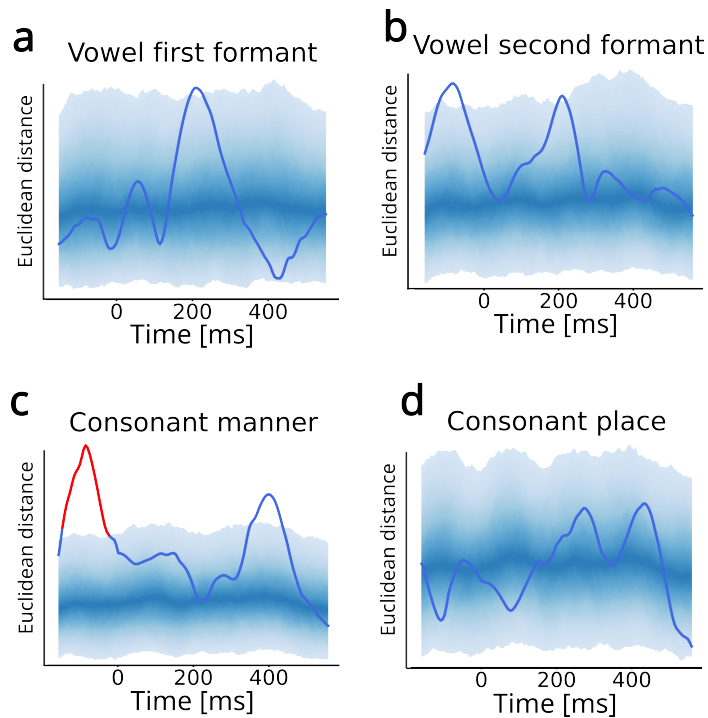

**Supplementary Fig. 9 | Linear discriminant analysis during natural speech perception.** **a.** Vowel first formant. The 95% confidence region of the surrogate (chance-level) distribution is shown with brighter shading for increasingly peripheral percentiles. Red segments indicate significant periods after multiple comparison correction (cluster-based test). **b.** Vowel second formant. Coloring as in **a.** **c.** Consonant manner of articulation. Coloring as in **a.** **d.** Consonant place of articulation. Coloring as in **a.**

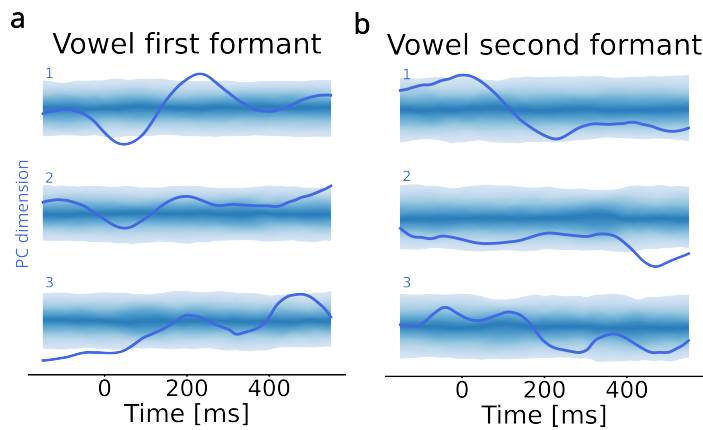

**Supplementary Fig. 10 | Rank regression during natural speech perception.** **a.** Correlation between vowel first formant ranks and coordinates on PC axes. The 95% confidence region of the surrogate (chance-level) distribution is shown with brighter shading for increasingly peripheral percentiles. Numbers indicate PC dimensions. **b.** Correlation between vowel second formant ranks and coordinates on PC axes. Coloring and numbering as in **a.**

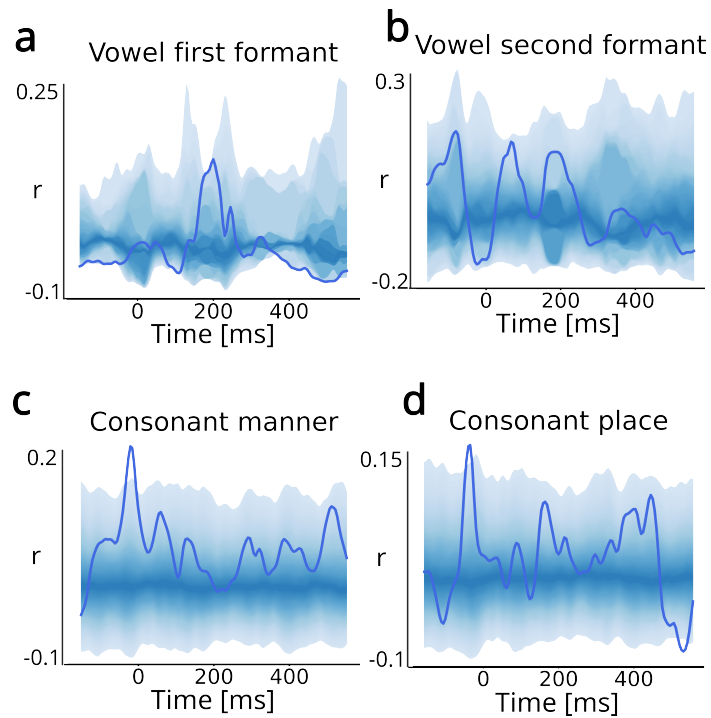

**Supplementary Fig. 11 | K-means clustering during natural speech perception.** **a.** Correlation between vowel first formant and corresponding k-means attribution matrices at each time point. The 95% confidence region of the surrogate (chance-level) distribution is shown with brighter shading for increasingly peripheral percentiles. **b.** Correlation between vowel second formant and corresponding k-means attribution matrices at each time point. Coloring as in **a.** **c.** Correlation between consonant manner and corresponding k-means attribution matrices at each time point. Coloring as in **a.** **d.** Correlation between consonant place and corresponding k-means attribution matrices at each time point. Coloring as in **a.**

**Supplementary Table 7 | Summary of the significant window locations during natural speech perception identified through control analyses.** Bold entries indicate peaks that were consistent across analyses. Entries in brackets indicate existing peaks that did not cross the significance threshold. Entries in red indicate peaks surviving multiple comparison correction (cluster-based test). All values are in ms.

| Phonetic feature group | Clustering         | LDA              | Rank regression | K-means    |
|------------------------|--------------------|------------------|-----------------|------------|
| Vowel first formant    | <b>(200)</b>       | <b>200</b>       | <b>200</b>      | <b>200</b> |
| Vowel second formant   | <b>-100, (200)</b> | <b>-100, 200</b> | 0               |            |
| Consonant manner       | <b>-100, 400</b>   | <b>-100, 400</b> | not applicable  | -25        |
| Consonant place        |                    |                  | not applicable  | -25        |

## 1 Control analyses for semantic encoding

2 We also performed control analyses for the semantic encoding results. We confirmed  
3 that our results hold when using a different number of PC dimensions to com-  
4 pute the Euclidean distances between semantic features, both for the semantic task  
5 (Supplementary Fig. 12) and natural speech perception (Supplementary Fig. 13).

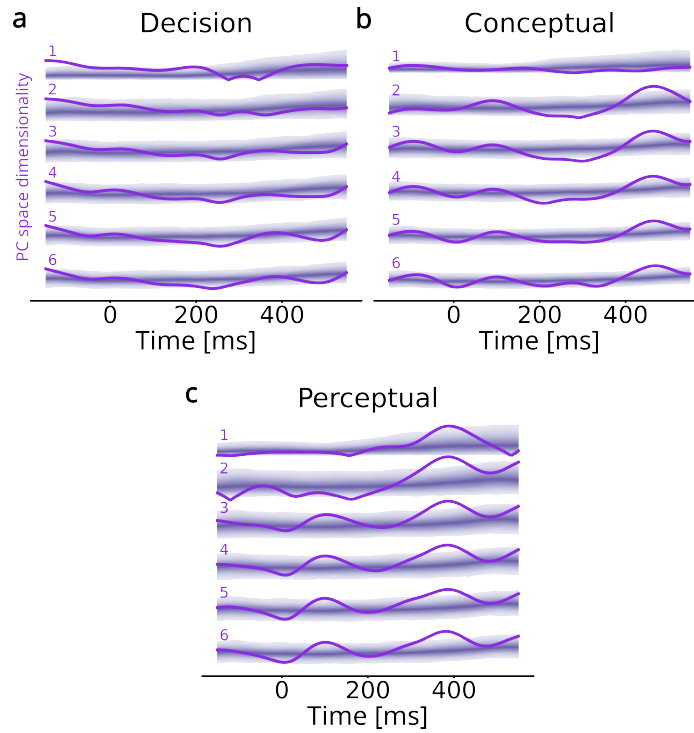

**Supplementary Fig. 12 | Encoding of semantic features across dimensions during semantic categorization.** **a.** Decision kernels. The 95% confidence region of the surrogate (chance-level) distribution is shown with brighter shading for increasingly peripheral percentiles. **b.** Conceptual kernels. Coloring and numbering as in **a.** **c.** Perceptual kernels. Coloring and numbering as in **a.**

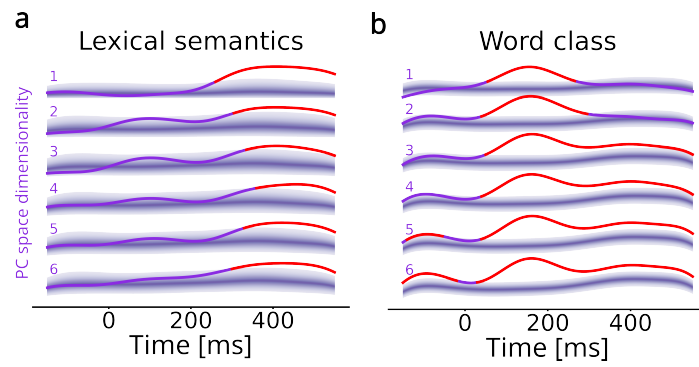

**Supplementary Fig. 13 | Encoding of semantic features across dimensions during natural speech perception. a.** Lexical semantic kernels. The 95% confidence region of the surrogate (chance-level) distribution is shown with brighter shading for increasingly peripheral percentiles. Red segments indicate significant periods after multiple comparison correction (cluster-based test). Numbers indicate the dimensionality of the PC space. **b.** Word class kernels. Coloring and numbering as in **a**.



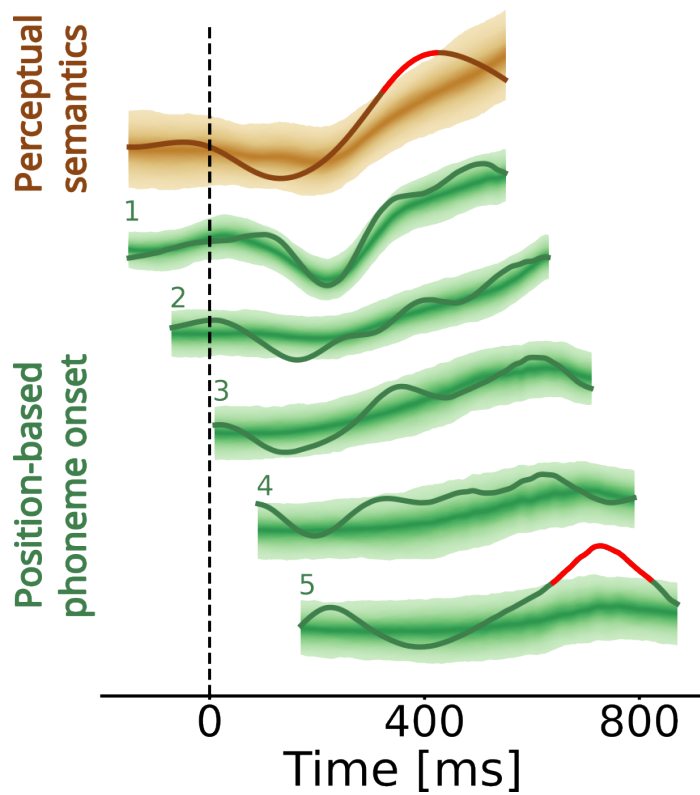

**Supplementary Fig. 14 | Concurrent encoding of phonetic and semantic features during semantic task** Kernels for the position-based phoneme onsets (green) within a word shifted by average phoneme duration (80 ms) and aligned with the perceptual semantic kernel at word onset (brown). The 95% confidence region of the surrogate (chance-level) distribution is shown with brighter shading for increasingly peripheral percentiles. Red segments indicate significant periods after multiple comparison correction (cluster-based test).
